# Supplementary material for: Bone Response to Fluoride Exposure Is Influenced by Genetics
Source: PLoS One. 2014 Dec 11;9(12):e114343. doi: 10.1371/journal.pone.0114343 (PMC4263599; doi:10.1371/journal.pone.0114343)
Supplement: S3 Table — Complete list of identified proteins with differences in abundance in the comparison between 10 ppmF-treated 129P3/J and 50 ppmF-treated 129P3/J mice. (DOCX) [file pone.0114343.s008.docx]

**Supplemental Table 3.** Identified proteins with differences in abundance in the comparison between 10 ppmF-treated 129P3/J and 50 ppmF-treated 129P3/J mice.

| **Acession Number*a*** | **Protein*b*** | **Ratio*c*** | **Nº of peptides*d*** |
| --- | --- | --- | --- |
| Q6NV66 | Protein Zfp 646 | 2.6 | 2 |
| P56716 | Oxygen-regulated protein 1 | 1.7 | 2 |
| Q8CJ19 | Protein-methionine sulfoxide oxidase MICAL3 | 0.5 | 2 |
| Q6PDQ2 | Chromodomain-helicase-DNA-binding protein 4 | 0.5 | 2 |
| Q8BL06 | Inactive ubiquitin carboxyl-terminal hydrolase | 0.5 | 2 |

*a*Protein accession numbers from UniProtKB. *b*Protein name. *c*Ratio of the relative protein abundance between (A) 10 ppmF-treated 129P3/J and (B) 50 ppmF-treated 129P3/J mice. Significant differences in protein abundance were considered when ratio ≤ 0.5 or ≥ 1.5. Ratio ≤ 0.5 means increase in group B in relation to group A and ratio ≥ 1.5 means decrease in group B in relation to group A. *d*Number of peptides identified.
